# Supplementary material for: ARED: Antibiotic Response determined by Euclidean Distance with highly sensitive Escherichia coli biosensors
Source: Research Square preprint supplement (doi:10.21203/rs.3.rs-1013453/v1), 2021-11-05
Supplement: Supplementary file 1 [file 40c59f29663b369e1af8ccb2.xlsx]

## Sheet: Title page
							Applied Microbiology and Biotechnology
					Supporting Information
							for
	ARED: Antibiotic Response determined by Euclidean Distance
	with highly sensitive Escherichia coli biosensors
							Haoran Shi 1,2, Trillion Surya Lioe 1,2, Kelly van der Eng 1,2, Ryanica Suryjaya 1,2, Ziyi Feng 1,2, Boris Tefsen 1,3, Sam EV Linsen 2
			1	Department of Biological Sciences, Xi’an Jiaotong-Liverpool University, Suzhou, Jiangsu, 215123, People’s Republic of China
			2	Hangzhou SquaredAnt Network Technology Co., Ltd., 311100, Hangzhou, Zhejiang, People’s Republic of China
			3	Ronin Institute, 127 Haddon Place, Montclair, NJ, 07043, United States of America
			*	corresponding author: Boris Tefsen & Sam Linsen
				E-mail: boris.tefsen@ronininstitute.org (Boris Tefsen); sl@squaredant.com (Sam Linsen)
				Table S1	Summary of mutations in all ABSBs
				Table S2	Description of the genetic background of ABSBs and their relations to observed sensitivities.
					The purpose of this document is to inform the reader on evidence from literature that could implicate the ABSB mutations in antibiotic sensitivity.
					This could be helpful for understanding the role of these genes after exposure to antibiotics. However, these descriptions require further experimental validation.

## Sheet: Table S1
POS	REF	ALT	effect	HGVS_P	gene	geneID	description	GO	KEGG	Strains
6377	A	T	stop_gained	p.Leu28*	yaaA	b0006	peroxide resistance protein, lowers intracellular iron	-	-	Samples=SA27H17,SA46C19,SA48C14
47348	C	T	missense_variant	p.Leu35Phe	kefF	b0046	potassium-efflux system ancillary protein for KefC, glutathione-regulated; quinone oxidoreductase, FMN-dependent	GO:0032414;GO:0006813;GO:0005886;GO:0010181;GO:0003955;GO:1901381	-	Samples=SA32N10
57404	T	C	missense_variant	p.Leu14Ser	djlA	b0055	membrane-anchored DnaK co-chaperone, DNA-binding protein	GO:0051087;GO:0016021;GO:0016020;GO:0005886	-	Samples=SA062A18,SA063F21,SA19B14,SA25aC12,SA27H17,SA28I03,SA32A05,SA32N10,SA46C19,SA48C14
109403	C	T	NDEF	NDEF	NDEF	NDEF	NDEF	NDEF	NDEF	Samples=SA32N10
193490	CT	C	NDEF	NDEF	NDEF	NDEF	NDEF	NDEF	NDEF	Samples=SA48C14
193494	T	C	NDEF	NDEF	NDEF	NDEF	NDEF	NDEF	NDEF	Samples=SA48C14
199432	C	T	missense_variant	p.Ser502Phe	bamA	b0177	BamABCDE complex OM biogenesis outer membrane pore-forming assembly factor	GO:0051205;GO:0016021;GO:0009279;GO:0043165	-	Samples=SA48C14
199433	C	A	NDEF	NDEF	NDEF	NDEF	NDEF	NDEF	NDEF	Samples=SA48C14
243829	GT	G	frameshift_variant	p.Phe97fs	gmhA	b0222	D-sedoheptulose 7-phosphate isomerase	GO:0005737;GO:0008968;GO:0005975;GO:0030246;GO:2001061;GO:0008270	K03271-ko00540 Lipopolysaccharide biosynthesis	Samples=SA21K01
245156	AC	A	frameshift_variant	p.Val217fs	ldtF	b0224	L,D-transpeptidase-related protein	GO:0016787;GO:0009252;GO:0071555;GO:0016740;GO:0008360;GO:0016757	-	Samples=SA46C19
481236	T	A	NDEF	NDEF	NDEF	NDEF	NDEF	NDEF	NDEF	Samples=SA03L04
482675	G	A	stop_gained	p.Gln577*	acrB	b0462	multidrug efflux system protein	GO:0015307;GO:0006855;GO:0005215;GO:0016021;GO:0016020;GO:0042493;GO:0015238;GO:0005887;GO:0005886;GO:0042802	K18138-ko01501 beta-Lactam resistance;ko01503 Cationic antimicrobial peptide (CAMP) resistance	Samples=SA03L04
484331	GC	G	frameshift_variant	p.Leu25fs	acrB	b0462	multidrug efflux system protein	GO:0015307;GO:0006855;GO:0005215;GO:0016021;GO:0016020;GO:0042493;GO:0015238;GO:0005887;GO:0005886;GO:0042802	K18138-ko01501 beta-Lactam resistance;ko01503 Cationic antimicrobial peptide (CAMP) resistance	Samples=SA062A18,SA063F21,SA19B14,SA25aC12,SA27H17,SA28I03,SA32A05,SA32N10,SA46C19,SA48C14
508484	G	A	NDEF	NDEF	NDEF	NDEF	NDEF	NDEF	NDEF	Samples=SA32A05
584230	T	A	missense_variant	p.Leu184Met	appY	b0564	global transcriptional activator; DLP12 prophage	GO:0043565;GO:0003700;GO:0005829;GO:0016036;GO:0006351;GO:0000987;GO:0045893	K07780-ko02020 Two-component system	Samples=SA27H17
584231	T	G	missense_variant	p.Leu184Trp	appY	b0564	global transcriptional activator; DLP12 prophage	GO:0043565;GO:0003700;GO:0005829;GO:0016036;GO:0006351;GO:0000987;GO:0045893	K07780-ko02020 Two-component system	Samples=SA27H17
645423	C	T	NDEF	NDEF	NDEF	NDEF	NDEF	NDEF	NDEF	Samples=SA03L04
660887	T	A	missense_variant	p.Gln164His	ybeF	b0629	LysR family putative transcriptional regulator	GO:0003700;GO:0006355;GO:0006351;GO:0003677	-	Samples=SA32A05
696411	G	A	NDEF	NDEF	NDEF	NDEF	NDEF	NDEF	NDEF	Samples=SA062A18
696437	G	A	NDEF	NDEF	NDEF	NDEF	NDEF	NDEF	NDEF	Samples=SA062A18
710911	G	A	NDEF	NDEF	NDEF	NDEF	NDEF	NDEF	NDEF	Samples=SA32N10
777266	A	T	stop_gained	p.Lys309*	tolA	b0739	membrane anchored protein in TolA-TolQ-TolR complex	GO:0046718;GO:0043213;GO:0071237;GO:0005215;GO:0016021;GO:0017038;GO:0005887;GO:0005886;GO:0032153;GO:0051301	-	Samples=SA32N10
777742	GA	G	frameshift_variant	p.Lys2fs	tolB	b0740	periplasmic protein	GO:0017038;GO:0042597	-	Samples=SA27H17
777850	T	A	NDEF	NDEF	NDEF	NDEF	NDEF	NDEF	NDEF	Samples=SA25aC12
779464	T	C	missense_variant	p.Leu133Pro	pal	b0741	peptidoglycan-associated outer membrane lipoprotein	GO:0016021;GO:0009279	-	Samples=SA25aC12
780453	A	C	NDEF	NDEF	NDEF	NDEF	NDEF	NDEF	NDEF	Samples=SA32N10
1128025	G	A	missense_variant	p.Ala63Thr	murJ	b1069	putative lipid II flippase	GO:0015836;GO:0005887;GO:0034203;GO:0016021;GO:0006810;GO:0015648;GO:0034204;GO:0071555;GO:0008360;GO:0009252;GO:0005886	-	Samples=SA32A05
1196220	C	T	NDEF	NDEF	NDEF	NDEF	NDEF	NDEF	NDEF	Samples=SA03L04,SA062A18,SA063F21,SA19B14,SA21K01,SA25aC12,SA27H17,SA28I03,SA32A05,SA32N10,SA46C19,SA48C14
1305782	G	A	missense_variant	p.Gly7Arg	oppF	b1247	oligopeptide ABC transporter ATPase	GO:0015031;GO:0015833;GO:0016887;GO:0005524;GO:0005886	K10823-ko02024 Quorum sensing;ko01501 beta-Lactam resistance;ko02010 ABC transporters	Samples=SA25aC12
1356762	T	A	stop_gained	p.Lys117*	sapA	b1294	antimicrobial peptide transport ABC transporter periplasmic binding protein	GO:0015031;GO:0015197;GO:0043190;GO:0055085;GO:0030288	K19226-ko02010 ABC transporters;ko01503 Cationic antimicrobial peptide (CAMP) resistance	Samples=SA32A05
1416373	G	A	NDEF	NDEF	NDEF	NDEF	NDEF	NDEF	NDEF	Samples=SA21K01
1424395	T	C	missense_variant	p.Leu205Pro	trkG	b1363	Rac prophage; potassium transporter subunit	GO:0005267;GO:0071805;GO:0016021;GO:0005886;GO:0030955;GO:0005887;GO:0015388;GO:0022820	-	Samples=SA48C14
1544433	G	A	stop_gained	p.Arg428*	yddK	b1471		-	-	Samples=SA48C14
1558588	G	A	missense_variant	p.Pro144Ser	ddpD	b1484	D,D-dipeptide ABC transporter ATPase	GO:0015031;GO:0015833;GO:0016887;GO:0005524;GO:0005886	K02031-ko02024 Quorum sensing	Samples=SA32N10
1644688	C	T	missense_variant	p.Gly72Glu	rem	b1561	Qin prophage; uncharacterized protein	-	-	Samples=SA32A05
1751802	G	A	missense_variant	p.Arg677Cys	ydhV	b1673	putative oxidoreductase subunit	GO:0016625;GO:0051536;GO:0046872;GO:0051539;GO:0009055	-	Samples=SA28I03
1844128	G	A	NDEF	NDEF	NDEF	NDEF	NDEF	NDEF	NDEF	Samples=SA062A18
1853227	G	A	NDEF	NDEF	NDEF	NDEF	NDEF	NDEF	NDEF	Samples=SA062A18
1931586	C	T	missense_variant	p.Pro236Ser	purT	b1849	phosphoribosylglycinamide formyltransferase 2	GO:0006189;GO:0000287;GO:0004644;GO:0005524;GO:0043815	K08289-ko00230 Purine metabolism;ko00670 One carbon pool by folate	Samples=SA32N10
1939585	C	T	stop_gained	p.Trp203*	lpxM	b1855	myristoyl-acyl carrier protein (ACP)-dependent acyltransferase	GO:0019107;GO:0009276;GO:0036104;GO:0005887;GO:0009103;GO:0016747	K02560-ko00540 Lipopolysaccharide biosynthesis	Samples=SA062A18
1993821	C	T	missense_variant	p.Val296Ile	uvrC	b1913	excinuclease UvrABC, endonuclease subunit	GO:0005737;GO:0009380;GO:0009381;GO:0006289;GO:0009432;GO:0003677	K03703-ko03420 Nucleotide excision repair	Samples=SA062A18
2025279	T	C	NDEF	NDEF	NDEF	NDEF	NDEF	NDEF	NDEF	Samples=SA062A18,SA063F21,SA25aC12,SA28I03,SA32A05,SA32N10
2105984	A	T	missense_variant	p.Ile25Asn	wbbI	b2034	d-Galf:alpha-d-Glc beta-1,6-galactofuranosyltransferase	GO:0005737;GO:0008921;GO:0016757;GO:0009103	-	Samples=SA48C14
2159245	A	T	missense_variant	p.Lys287Ile	mdtC	b2076	multidrug efflux system, subunit C	GO:0015307;GO:0005215;GO:0016021;GO:0005887;GO:0005886	K07789-ko02020 Two-component system	Samples=SA32A05
2167411	G	A	missense_variant	p.Ala37Val	ogrK	b2082	orphan Ogr protein, positive regulator of P2 growth	GO:0006355;GO:0006351	-	Samples=SA062A18
2237736	C	T	NDEF	NDEF	NDEF	NDEF	NDEF	NDEF	NDEF	Samples=SA25aC12
2731377	G	T	NDEF	NDEF	NDEF	NDEF	NDEF	NDEF	NDEF	Samples=SA32A05
2803792	G	A	missense_variant	p.Met97Ile	nrdF	b2676	ribonucleoside-diphosphate reductase 2, beta subunit, ferritin-like protein	GO:0005737;GO:0005971;GO:0009186;GO:0030145;GO:0004748;GO:0009263;GO:0006260;GO:0005506;GO:0046872	K00526-ko00230 Purine metabolism;ko00240 Pyrimidine metabolism	Samples=SA25aC12
2822664	G	A	NDEF	NDEF	NDEF	NDEF	NDEF	NDEF	NDEF	Samples=SA03L04
2890431	G	A	missense_variant	p.Pro490Ser	cysJ	b2764	sulfite reductase, alpha subunit, flavoprotein	GO:0009337;GO:0042602;GO:0050660;GO:0070814;GO:0019344;GO:0010181;GO:0000103;GO:0004783	K00380-ko00920 Sulfur metabolism	Samples=SA062A18,SA063F21,SA19B14,SA25aC12,SA27H17,SA28I03,SA32A05,SA32N10,SA46C19,SA48C14
3282642	C	T	missense_variant	p.Pro223Ser	agaS	b3136	tagatose-6-phosphate ketose/aldose isomerase	GO:0005975;GO:0030246;GO:0016861	-	Samples=SA062A18,SA063F21,SA19B14,SA25aC12,SA27H17,SA28I03,SA32A05,SA32N10,SA46C19,SA48C14
3282643	C	T	missense_variant	p.Pro223Leu	agaS	b3136	tagatose-6-phosphate ketose/aldose isomerase	GO:0005975;GO:0030246;GO:0016861	-	Samples=SA062A18,SA063F21,SA19B14,SA25aC12,SA27H17,SA28I03,SA32A05,SA32N10,SA46C19,SA48C14
3392636	C	T	missense_variant	p.Gly1208Asp	yhdP	b4472	DUF3971-AsmA2 domains protein	-	-	Samples=SA32N10
3392637	C	T	missense_variant	p.Gly1208Ser	yhdP	b4472	DUF3971-AsmA2 domains protein	-	-	Samples=SA32N10
3636348	C	T	missense_variant	p.Glu355Lys	yhiN	b3492	putative oxidoreductase	GO:0005829;GO:0016491	-	Samples=SA062A18,SA063F21,SA19B14,SA25aC12,SA27H17,SA28I03,SA32A05,SA32N10,SA46C19,SA48C14
3727810	A	T	NDEF	NDEF	NDEF	NDEF	NDEF	NDEF	NDEF	Samples=SA27H17
3778990	T	C	missense_variant	p.Phe531Ser	lldP	b3603	L-lactate permease	GO:0006974;GO:0015295;GO:0015129;GO:0005887;GO:0005886	-	Samples=SA32A05
3795218	CT	C	frameshift_variant	p.Phe98fs	waaF	b3620	ADP-heptose:LPS heptosyltransferase II	GO:0008713;GO:0005829;GO:0009244;GO:0016757;GO:0009103	K02843-ko00540 Lipopolysaccharide biosynthesis	Samples=SA28I03
3806175	A	C	stop_gained	p.Leu298*	waaG	b3631	UDP-glucose:(heptosyl)lipopolysaccharide alpha-1,3-glucosyltransferase; lipopolysaccharide core biosynthesis protein; lipopolysaccharide glucosyltransferase I	GO:0008919;GO:0016757;GO:0009244	K02844-ko00540 Lipopolysaccharide biosynthesis	Samples=SA063F21
3923419	G	A	missense_variant	p.Pro88Ser	rsmG	b3740	16S rRNA m(7)G527 methyltransferase, SAM-dependent; glucose-inhibited cell-division protein	GO:0005737;GO:0070043	-	Samples=SA25aC12
3923420	A	G	NDEF	NDEF	NDEF	NDEF	NDEF	NDEF	NDEF	Samples=SA25aC12
4190986	C	T	missense_variant	p.Glu295Lys	thiH	b3990	tyrosine lyase, involved in thiamine-thiazole moiety synthesis	GO:0009229;GO:0009228;GO:0036355;GO:0016829;GO:0006974;GO:0005506;GO:0051536;GO:0051539	K03150-ko00730 Thiamine metabolism	Samples=SA32N10
4251381	A	T	missense_variant	p.Lys226Asn	yjbI	b4038		-	-	Samples=SA062A18
4268909	T	C	missense_variant	p.Tyr35Cys	yjbS	b4621	uncharacterized protein	-	-	Samples=SA062A18
4382000	G	T	missense_variant	p.Arg107Ser	frdA	b4154	anaerobic fumarate reductase catalytic and NAD/flavoprotein subunit	GO:0045284;GO:0005829;GO:0016020;GO:0071973;GO:0006974;GO:0009061;GO:0022900;GO:0006113;GO:0044780;GO:0000104;GO:0050660;GO:0016627;GO:0071949;GO:0009055	K00244-ko00020 Citrate cycle (TCA cycle);ko00190 Oxidative phosphorylation;ko01200 Carbon metabolism;ko02020 Two-component system;ko00720 Carbon fixation pathways in prokaryotes;ko00650 Butanoate metabolism;ko00620 Pyruvate metabolism	Samples=SA32N10
4413977	G	A	missense_variant	p.Gly317Asp	yjfC	b4186	ATP-Grasp family ATPase	GO:0046872;GO:0016874;GO:0005524	-	Samples=SA25aC12
4492762	T	C	missense_variant	p.Lys197Arg	idnO	b4266	5-keto-D-gluconate-5-reductase	GO:0005737;GO:0046183;GO:0016491;GO:0019521;GO:0008874	-	Samples=SA062A18
4597648	A	G	NDEF	NDEF	NDEF	NDEF	NDEF	NDEF	NDEF	Samples=SA32A05

## Sheet: Table S2
pos	gene	SA03L04	SA19B14	SA21K01	SA25aC12	SA27H17	SA28I03	SA32A05	SA32N10	SA46C19	SA48C14	SA062A18	SA063F21		Description	Effect on sensitivity	Reference (PMID)	Described in main article
6377	yaaA	-	-	-	-	+	-	-	-	+	+	-	-		During H2O2 stress, prevents oxidative damage to both DNA and proteins by diminishing the amount of unincorporated iron within the cell.	unlikely	Liu 2011, PMID: 21378183	yes
47348	kefF	-	-	-	-	-	-	-	+	-	-	-	-		A change in expression levels has been shown for frdA, kefF, and purT in response to exposure to TET or TMP, and mutations for each of these genes have been found in N10. KefF is the ancillary subunit of a glutathione-gated potassium efflux system that modulates cytoplasmic pH , and, interestingly, has been shown to have oxidoreductase activity towards quinones that is dispensable for its role in…	potentially	Mitosch 2017, PMID28342718 Roosild 2010, PMID: 21041667 Lyngberg 2011, PMID: 21742892	no
57404	djlA	-	+	-	+	+	+	+	+	+	+	+	+		A null mutant of djlA was shown to have a defective cell envelope and enhanced sensitivity towards spectinomycin. Perhaps, the substitution of the nonpolar leucine at position 14 into the polar serine also affects the functional interaction capability of the TM domain of the DjlA protein.	potentially	Clarke 1996, PMID8809778	yes
109403	NDEF	-	-	-	-	-	-	-	+	-	-	-	-
193490	NDEF	-	-	-	-	-	-	-	-	-	+	-	-
193494	NDEF	-	-	-	-	-	-	-	-	-	+	-	-
199432	bamA	-	-	-	-	-	-	-	-	-	+	-	-		The bamA missense mutation in C14 could lead to diminished assembly of β-barrel proteins,	potentially	Werner 2005, PMID: 16102012 Bennion 2010, PMID: 20598079	yes
199433	NDEF	-	-	-	-	-	-	-	-	-	+	-	-
243829	gmhA	-	-	+	-	-	-	-	-	-	-	-	-		Has essential role in lipopolysaccharide (LPS) synthesis through heptose biosynthesis pathway	potentially	Shih 2001, PMID: 11496013	yes
245156	ldtF	-	-	-	-	-	-	-	-	+	-	-	-		LdtF (YafK) was previously shown to be involved in biofilm formation and recently designated as an L,D-transpeptidase-related protein that is required for peptidoglycan synthesis under stress conditions The frameshift mutation in ldtF in C19 leads to a change in the final 30 amino acids (VNGRYVVSKPLSHEVVQPQLASNYTLPEAK) of the protein to only 10 amino acids (SMVVTWSASR), which is likely to impact …	potentially	Sheikh 2001, PMID: 11555281 Morè 2019, PMID: 30723128	yes
481236	NDEF	+	-	-	-	-	-	-	-	-	-	-	-
482675	acrB	+	-	-	-	-	-	-	-	-	-	-	-		An essential part of the drug efflux pump composed of AcrA, AcrB and TolC	yes	Du 2014, PMID: 24747401	yes
484331	acrB	-	+	-	+	+	+	+	+	+	+	+	+		An essential part of the drug efflux pump composed of AcrA, AcrB and TolC	yes	Du 2014, PMID: 24747401	yes
508484	NDEF	-	-	-	-	-	-	+	-	-	-	-	-
584230	appY	-	-	-	-	+	-	-	-	-	-	-	-		It is a horizontally-transferred gene coding for a putative transcriptional activator and is most likely essential, suggesting the mutations found in this gene is unlikely to render the protein inactive. It cannot be excluded, however, that the change from leucine to arginine at residue 184 has an effect on its transcriptional activity on one or more unknown target genes that are potentially invo…	unlikely	Atlung 1994, PMID: 8071219; Bykov 2020, PMID: 32175329 Gerdes 2003, PMID: 13129938	no
584231	appY	-	-	-	-	+	-	-	-	-	-	-	-		It is a horizontally-transferred gene coding for a putative transcriptional activator and is most likely essential, suggesting the mutations found in this gene is unlikely to render the protein inactive. It cannot be excluded, however, that the change from leucine to arginine at residue 184 has an effect on its transcriptional activity on one or more unknown target genes that are potentially invo…	unlikely	Atlung 1994, PMID: 8071219; Bykov 2020, PMID: 32175329 Gerdes 2003, PMID: 13129938	no
645423	NDEF	+	-	-	-	-	-	-	-	-	-	-	-
660887	ybeF	-	-	-	-	-	-	+	-	-	-	-	-		Not described in literature	no information		no
696411	NDEF	-	-	-	-	-	-	-	-	-	-	+	-
696437	NDEF	-	-	-	-	-	-	-	-	-	-	+	-
710911	NDEF	-	-	-	-	-	-	-	+	-	-	-	-
777266	tolA	-	-	-	-	-	-	-	+	-	-	-	-		Part of the Tol-Pal complex, known to help maintain OM integrity in Gram-negative bacteria and a lack of any of its functional components will result in a compromised OM that enables enhanced entry of antibiotics	yes	Szczepaniak 2020, PMID: 32472934	yes
777742	tolB	-	-	-	-	+	-	-	-	-	-	-	-		Part of the Tol-Pal complex, known to help maintain OM integrity in Gram-negative bacteria and a lack of any of its functional components will result in a compromised OM that enables enhanced entry of antibiotics	yes	Szczepaniak 2020, PMID: 32472934	yes
777850	NDEF	-	-	-	+	-	-	-	-	-	-	-	-
779464	pal	-	-	-	+	-	-	-	-	-	-	-	-		Part of the Tol-Pal complex, known to help maintain OM integrity in Gram-negative bacteria and a lack of any of its functional components will result in a compromised OM that enables enhanced entry of antibiotics. The leucine at position 133 in Pal has shown to be highly conserved among many Gram-negative bacteria and part of a domain that is important for binding to TolB and peptidoglyca.	potentially	Szczepaniak 2020, PMID: 32472934 Cascales 2004, PMID: 14731286	yes
780453	NDEF	-	-	-	-	-	-	-	+	-	-	-	-
1128025	murJ	-	-	-	-	-	-	+	-	-	-	-	-		The alanine to threonine change at position 63 in MurJ, the essential flippase for LipidII carrying peptidoglycan precursors, may have some subtle effects on peptidoglycan assembly and subsequently on antibiotic sensitivity of this ABSB.	potentially	Sham 2014 PMID 25013077	no
1196220	NDEF	+	+	+	+	+	+	+	+	+	+	+	+
1305782	oppF	-	-	-	+	-	-	-	-	-	-	-	-		The mutation in oppF, coding for a subunit of the oligopeptide transporter complex, leads to Gly7Arg substitution	unlikely	Andrews 1986, PMID: 3511033	no
1356762	sapA	-	-	-	-	-	-	+	-	-	-	-	-		SapA is predicted to be periplasmic and has been shown to be important for resistance of H. influenzae to antimicrobial peptides. Not much is known about its function in E. coli yet, but it might help in stabilizing cell envelope integrity or efflux of certain molecules from the cytoplasm by interacting with the putrescine exporter SapBCDF. Furthermore, it was shown that a SapA deletion mutant ha…	potentially	Mason 2005, PMID: 15618200 Sugiyama 2016, PMID: 27803167 Jindal 2019, PMID: 31438868 Mitosch 2017, PMID28342718	yes
1416373	NDEF	-	-	+	-	-	-	-	-	-	-	-	-
1424395	trkG	-	-	-	-	-	-	-	-	-	+	-	-		TrkG, the potassium translocating subunit of a potassium uptake system complex, carries a Leu205Pro mutation	unlikely	Harms 2001, PMID: 11700350	no
1544433	yddK	-	-	-	-	-	-	-	-	-	+	-	-		pseudogene	unlikely		no
1558588	ddpD	-	-	-	-	-	-	-	+	-	-	-	-		The D,D-dipeptide transport complex can be hijacked for illicit antibiotic transport and a null mutant of the putative ATP-binding subunit DdpD of this transport system was shown to accumulate the cationic fluorescent dye carbocyanine diS-C3(5). It cannot be excluded that the missense mutation in ddpD in N10, leading to a proline to serine substitution at position 144, might have a subtle influen…	potentially	Smith 1999, PMID: 10537211 Jindal 2019, PMID: 31438868	no
1644688	rem	-	-	-	-	-	-	+	-	-	-	-	-		Not described in literature	no information		no
1751802	ydhV	-	-	-	-	-	+	-	-	-	-	-	-		This gene codes for an oxidoreductase that binds to a bis-molybdenum-metal-binding pterin cofactor	unlikely	Reschke 2019, PMID: 30945846	no
1844128	NDEF	-	-	-	-	-	-	-	-	-	-	+	-
1853227	NDEF	-	-	-	-	-	-	-	-	-	-	+	-
1931586	purT	-	-	-	-	-	-	-	+	-	-	-	-		A change in expression levels has been shown for frdA, kefF, and purT in response to exposure to TET or TMP, and mutations for each of these genes have been found in N10. PurT is a glycinamide ribonucleotide transformylase needed for purine synthesis. The Pro236Ser mutation might disturb the folding of the β-sheet that normally ends at the previous amino acid, but how this might affect antibiotic…	potentially	Mitosch 2017, PMID28342718 Thoden 2000, PMID: 10913290	no
1939585	lpxM	-	-	-	-	-	-	-	-	-	-	+	-		Defective lipopolysaccharide (LPS) synthesis will lead to a compromised OM. Second-generation ABSB A18 has a premature stop codon at position 203 in LpxM, the myristoyltransferase responsible for adding the final secondary acyl chain to generate hexa-acylated lipid A, the hydrophobic moiety of LPS embedded in the OM.	potentially	Raetz 2002, PMID: 12045108 Ebbensgaard 2018, PMID: 30245684 Clementz 1997, PMID: 9099672	no
1993821	uvrC	-	-	-	-	-	-	-	-	-	-	+	-		UvrC, which in this mutant leads to a Val296Ile substitution, is part of the repair system that catalyzes the recognition and processing of DNA lesions	unlikely	Verhoeven 2000, PMID: 10671556	no
2025279	NDEF	-	-	-	+	-	+	+	+	-	-	+	+
2105984	wbbI	-	-	-	-	-	-	-	-	-	+	-	-		the mutation at position 25 in WbbI in C14 likely has an impact on O antigen synthesis, which make up the outermost structure of the LPS.	potentially	Martorana 2014, PMID: 24967819	yes
2159245	mdtC	-	-	-	-	-	-	+	-	-	-	-	-		A Lys287Ile mutation in MdtC, a subunit responsible for substrate binding in the multidrug efflux system MdtABC-TolC .	potentially	Kim 2012, PMID: 22559837	no
2167411	ogrK	-	-	-	-	-	-	-	-	-	-	+	-		The gene ogrK, with a mutation leading to a Ala37Val substitution in this ABSB, is shown to be involved in protection against radiation damage	unlikely	Sargentini 2016, PMID: 27718375	no
2237736	NDEF	-	-	-	+	-	-	-	-	-	-	-	-
2731377	NDEF	-	-	-	-	-	-	+	-	-	-	-	-
2803792	nrdF	-	-	-	+	-	-	-	-	-	-	-	-		nrdF, with a mutation leading to a Met97Ile substitution in this ABSB, codes for a manganese-dependent aerobic ribonucleotide reductase induced upon iron starvation	unlikely	Martin 2011, PMID: 21338418	no
2822664	NDEF	+	-	-	-	-	-	-	-	-	-	-	-
2890431	cysJ	-	+	-	+	+	+	+	+	+	+	+	+		CysJ may play a role in sensitivity, as it is upregulated in response to TET or TMP. If the mutated cysJ in B14 would lead to a malfunctioning L-cysteine synthesis pathway, it could also affect sensitivity, given the observation that L-cysteine plays a role in the induction of antibiotic resistance in Salmonella enterica.	potentially	Mitosch 2017, PMID: 28342718 Turnbull 2008, PMID: 18957594	yes
3282642	agaS	-	+	-	+	+	+	+	+	+	+	+	+		agaS does not seem a likely sensitivity candidate, as the isomerase it encodes is involved in utilization of N-acetylgalactosamine, which E. coli K-12 strains are unable to import due to deletions in the operon coding for the importers	unlikely	Brinkkötter 2000, PMID: 10931310	yes
3282643	agaS	-	+	-	+	+	+	+	+	+	+	+	+		agaS does not seem a likely sensitivity candidate, as the isomerase it encodes is involved in utilization of N-acetylgalactosamine, which E. coli K-12 strains are unable to import due to deletions in the operon coding for the importers.	unlikely	Brinkkötter 2000, PMID: 10931310	yes
3392636	yhdP	-	-	-	-	-	-	-	+	-	-	-	-		A Gly1208Asn mutation is present in YhdP, which has recently been implicated in anterograde flow of phospholipids and its deletion mutant is included in the list of antibiotic-sensitive strains from the Keio collection. We examined the mutation found in N10 by running the wild type and mutant protein sequences through the Hidden Markov Model to predict its topology. The prediction suggested that …	potentially	Grimm 2020, PMID: 33046656 Liu 2010, PMID: 20065048 Krogh 2001, PMID: 11152613	no
3392637	yhdP	-	-	-	-	-	-	-	+	-	-	-	-		A Gly1208Asn mutation is present in YhdP, which has recently been implicated in anterograde flow of phospholipids and its deletion mutant is included in the list of antibiotic-sensitive strains from the Keio collection. We examined the mutation found in N10 by running the wild type and mutant protein sequences through the Hidden Markov Model to predict its topology. The prediction suggested that …	potentially	Grimm 2020, PMID: 33046656 Liu 2010, PMID: 20065048 Krogh 2001, PMID: 11152613	no
3636348	yhiN	-	+	-	+	+	+	+	+	+	+	+	+		The putative oxidoreductase encoded by yhiN has been shown to be upregulated after exposure to cephalosporin.	potentially	Liu 2019, PMID: 31616400	yes
3727810	NDEF	-	-	-	-	+	-	-	-	-	-	-	-
3778990	lldP	-	-	-	-	-	-	+	-	-	-	-	-		lldP encodes for a proton-driven L-lactate permease. It is not only upregulated after exposure to AMP and RIF, but a lldP deletion mutant is also shown to accumulate cationic dyes.	potentially	Lynch 1996, PMID: 8892825 Shaw 2003, PMID: 12736533 Jindal 2019, PMID: 31438868	no
3795218	waaF	-	-	-	-	-	+	-	-	-	-	-	-		Has essential role in lipopolysaccharide (LPS) synthesis through heptose biosynthesis pathway	potentially	Shih 2001, PMID: 11496013	yes
3806175	waaG	-	-	-	-	-	-	-	-	-	-	-	+		A glucosyltransferase adding the first glucose to the inner saccharide core of LPS	potentially	Yethon 2000, PMID: 10986272	yes
3923419	rsmG	-	-	-	+	-	-	-	-	-	-	-	-		RsmG, with a mutation leading to a Pro88Ser substitution, codes for a methyltransferase that plays a role in synthesis of ribosomal 16S RNA	unlikely	Benitez-Paez 2012, PMID: 22337945	no
3923420	NDEF	-	-	-	+	-	-	-	-	-	-	-	-
4190986	thiH	-	-	-	-	-	-	-	+	-	-	-	-		N10 harbors a mutated thiH (Glu295Lys), which probably does not cause great disturbance of its role in synthesis of the 4-methyl-5-β hydroxyethyl-thiazole monophosphate moiety of thiamine pyrophosphate (vitamin B12), as the latter is an essential component for bacterial survival .	unlikely	Kriek 2007, PMID: 17403671	no
4251381	yjbI	-	-	-	-	-	-	-	-	-	-	+	-		The essential gene yjbL (Lys226Asn), unknown function	unlikely	Gerdes 2003, PMID: 13129938	no
4268909	yjbS	-	-	-	-	-	-	-	-	-	-	+	-		The essential genes yjbS (Tyr35Cys), unknown function	unlikely	Gerdes 2003, PMID: 13129938	no
4382000	frdA	-	-	-	-	-	-	-	+	-	-	-	-		A change in expression levels has been shown for frdA, kefF, and purT in response to exposure to TET or TMP, and mutations for each of these genes have been found in N10. Interestingly, deletion of the anaerobic fumarate reductase FrdA was shown to make E. coli insensitive to ciprofloxacin killing and exposure to KAN led to downregulation of the gene. In our assays, OD600-ARED shows no N10 sensit…	potentially	Mitosch 2017, PMID28342718 Gutierrez 2017, PMID: 29225037 Shaw 2003, PMID: 12736533	no
4413977	yjfC	-	-	-	+	-	-	-	-	-	-	-	-		yjfC, with a mutation leading to a Gly317Asp substitution, encodes a homologue of a glutathionyl spermidine synthetase with unknown function	unlikely	Sui 2012, PMID: 23097746	no
4492762	idnO	-	-	-	-	-	-	-	-	-	-	+	-		IdnO, with a mutation leading to a Lys197Arg substitution, is coding for an 5-keto-D-gluconate 5-reductase involved in the L-idonate degradation pathway	unlikely	Bausch 1998, PMID: 9658018	no
4597648	NDEF	-	-	-	-	-	-	+	-	-	-	-	-

## Sheet: References for Table S2
References for Table S2
Andrews JC, Blevins TC, Short SA (1986) Regulation of peptide transport in Escherichia coli: induction of the trp-linked operon encoding the oligopeptide permease. J Bacteriol 165(2):428-33 doi:10.1128/jb.165.2.428-433.1986
Atlung T, Brøndsted L (1994) Role of the transcriptional activator AppY in regulation of the cyx appA operon of Escherichia coli by anaerobiosis, phosphate starvation, and growth phase. J Bacteriol 176(17):5414-22 doi:10.1128/jb.176.17.5414-5422.1994
Bausch C, Peekhaus N, Utz C, Blais T, Murray E, Lowary T, Conway T (1998) Sequence analysis of the GntII (subsidiary) system for gluconate metabolism reveals a novel pathway for L-idonic acid catabolism in Escherichia coli. J Bacteriol 180(14):3704-10 doi:10.1128/jb.180.14.3704-3710.1998
Benítez-Páez A, Villarroya M, Armengod ME (2012) Regulation of expression and catalytic activity of Escherichia coli RsmG methyltransferase. Rna 18(4):795-806 doi:10.1261/rna.029868.111
Bennion D, Charlson ES, Coon E, Misra R (2010) Dissection of β-barrel outer membrane protein assembly pathways through characterizing BamA POTRA 1 mutants of Escherichia coli. Mol Microbiol 77(5):1153-71 doi:10.1111/j.1365-2958.2010.07280.x
Brinkkötter A, Klöss H, Alpert C, Lengeler JW (2000) Pathways for the utilization of N-acetyl-galactosamine and galactosamine in Escherichia coli. Mol Microbiol 37(1):125-35 doi:10.1046/j.1365-2958.2000.01969.x
Bykov A, Glazunova O, Alikina O, Sukharicheva N, Masulis I, Shavkunov K, Ozoline O (2020) Excessive Promoters as Silencers of Genes Horizontally Acquired by Escherichia coli. Front Mol Biosci 7:28 doi:10.3389/fmolb.2020.00028
Cascales E, Lloubès R (2004) Deletion analyses of the peptidoglycan-associated lipoprotein Pal reveals three independent binding sequences including a TolA box. Mol Microbiol 51(3):873-85 doi:10.1046/j.1365-2958.2003.03881.x
Clarke DJ, Jacq A, Holland IB (1996) A novel DnaJ-like protein in Escherichia coli inserts into the cytoplasmic membrane with a type III topology. Mol Microbiol 20(6):1273-86 doi:10.1111/j.1365-2958.1996.tb02646.x
Clementz T, Zhou Z, Raetz CR (1997) Function of the Escherichia coli msbB gene, a multicopy suppressor of htrB knockouts, in the acylation of lipid A. Acylation by MsbB follows laurate incorporation by HtrB. J Biol Chem 272(16):10353-60 doi:10.1074/jbc.272.16.10353
Du D, Wang Z, James NR, Voss JE, Klimont E, Ohene-Agyei T, Venter H, Chiu W, Luisi BF (2014) Structure of the AcrAB-TolC multidrug efflux pump. Nature 509(7501):512-5 doi:10.1038/nature13205
Ebbensgaard A, Mordhorst H, Aarestrup FM, Hansen EB (2018) The Role of Outer Membrane Proteins and Lipopolysaccharides for the Sensitivity of Escherichia coli to Antimicrobial Peptides. Front Microbiol 9:2153 doi:10.3389/fmicb.2018.02153
Gerdes SY, Scholle MD, Campbell JW, Balázsi G, Ravasz E, Daugherty MD, Somera AL, Kyrpides NC, Anderson I, Gelfand MS, Bhattacharya A, Kapatral V, D'Souza M, Baev MV, Grechkin Y, Mseeh F, Fonstein MY, Overbeek R, Barabási AL, Oltvai ZN, Osterman AL (2003) Experimental determination and system level analysis of essential genes in Escherichia coli MG1655. J Bacteriol 185(19):5673-84 doi:10.1128/jb.…
Grimm J, Shi H, Wang W, Mitchell AM, Wingreen NS, Huang KC, Silhavy TJ (2020) The inner membrane protein YhdP modulates the rate of anterograde phospholipid flow in Escherichia coli. Proc Natl Acad Sci U S A 117(43):26907-26914 doi:10.1073/pnas.2015556117
Gutierrez A, Jain S, Bhargava P, Hamblin M, Lobritz MA, Collins JJ (2017) Understanding and Sensitizing Density-Dependent Persistence to Quinolone Antibiotics. Mol Cell 68(6):1147-1154.e3 doi:10.1016/j.molcel.2017.11.012
Harms C, Domoto Y, Celik C, Rahe E, Stumpe S, Schmid R, Nakamura T, Bakker EP (2001) Identification of the ABC protein SapD as the subunit that confers ATP dependence to the K+-uptake systems Trk(H) and Trk(G) from Escherichia coli K-12. Microbiology (Reading) 147(Pt 11):2991-3003 doi:10.1099/00221287-147-11-2991
Jindal S, Yang L, Day PJ, Kell DB (2019) Involvement of multiple influx and efflux transporters in the accumulation of cationic fluorescent dyes by Escherichia coli. BMC Microbiol 19(1):195 doi:10.1186/s12866-019-1561-0
Kim HS, Nikaido H (2012) Different functions of MdtB and MdtC subunits in the heterotrimeric efflux transporter MdtB(2)C complex of Escherichia coli. Biochemistry 51(20):4188-97 doi:10.1021/bi300379y
Kriek M, Martins F, Leonardi R, Fairhurst SA, Lowe DJ, Roach PL (2007) Thiazole synthase from Escherichia coli: an investigation of the substrates and purified proteins required for activity in vitro. J Biol Chem 282(24):17413-23 doi:10.1074/jbc.M700782200
Krogh A, Larsson B, von Heijne G, Sonnhammer EL (2001) Predicting transmembrane protein topology with a hidden Markov model: application to complete genomes. J Mol Biol 305(3):567-80 doi:10.1006/jmbi.2000.4315
Liu A, Tran L, Becket E, Lee K, Chinn L, Park E, Tran K, Miller JH (2010) Antibiotic sensitivity profiles determined with an Escherichia coli gene knockout collection: generating an antibiotic bar code. Antimicrob Agents Chemother 54(4):1393-403 doi:10.1128/aac.00906-09
Liu G, Olsen JE, Thomsen LE (2019) Identification of Genes Essential for Antibiotic-Induced Up-Regulation of Plasmid-Transfer-Genes in Cephalosporin Resistant Escherichia coli. Front Microbiol 10:2203 doi:10.3389/fmicb.2019.02203
Liu Y, Bauer SC, Imlay JA (2011) The YaaA protein of the Escherichia coli OxyR regulon lessens hydrogen peroxide toxicity by diminishing the amount of intracellular unincorporated iron. J Bacteriol 193(9):2186-96 doi:10.1128/jb.00001-11
Lynch AS, Lin EC (1996) Transcriptional control mediated by the ArcA two-component response regulator protein of Escherichia coli: characterization of DNA binding at target promoters. J Bacteriol 178(21):6238-49 doi:10.1128/jb.178.21.6238-6249.1996
Lyngberg L, Healy J, Bartlett W, Miller S, Conway SJ, Booth IR, Rasmussen T (2011) KefF, the regulatory subunit of the potassium efflux system KefC, shows quinone oxidoreductase activity. J Bacteriol 193(18):4925-32 doi:10.1128/jb.05272-11
Martin JE, Imlay JA (2011) The alternative aerobic ribonucleotide reductase of Escherichia coli, NrdEF, is a manganese-dependent enzyme that enables cell replication during periods of iron starvation. Mol Microbiol 80(2):319-34 doi:10.1111/j.1365-2958.2011.07593.x
Martorana AM, Motta S, Di Silvestre D, Falchi F, Dehò G, Mauri P, Sperandeo P, Polissi A (2014) Dissecting Escherichia coli outer membrane biogenesis using differential proteomics. PLoS One 9(6):e100941 doi:10.1371/journal.pone.0100941
Mason KM, Munson RS, Jr., Bakaletz LO (2005) A mutation in the sap operon attenuates survival of nontypeable Haemophilus influenzae in a chinchilla model of otitis media. Infect Immun 73(1):599-608 doi:10.1128/iai.73.1.599-608.2005
Mitosch K, Rieckh G, Bollenbach T (2017) Noisy Response to Antibiotic Stress Predicts Subsequent Single-Cell Survival in an Acidic Environment. Cell Syst 4(4):393-403.e5 doi:10.1016/j.cels.2017.03.001
Morè N, Martorana AM, Biboy J, Otten C, Winkle M, Serrano CKG, Montón Silva A, Atkinson L, Yau H, Breukink E, den Blaauwen T, Vollmer W, Polissi A (2019) Peptidoglycan Remodeling Enables Escherichia coli To Survive Severe Outer Membrane Assembly Defect. mBio 10(1) doi:10.1128/mBio.02729-18
Raetz CR, Whitfield C (2002) Lipopolysaccharide endotoxins. Annu Rev Biochem 71:635-700 doi:10.1146/annurev.biochem.71.110601.135414
Reschke S, Duffus BR, Schrapers P, Mebs S, Teutloff C, Dau H, Haumann M, Leimkühler S (2019) Identification of YdhV as the First Molybdoenzyme Binding a Bis-Mo-MPT Cofactor in Escherichia coli. Biochemistry 58(17):2228-2242 doi:10.1021/acs.biochem.9b00078
Roosild TP, Castronovo S, Healy J, Miller S, Pliotas C, Rasmussen T, Bartlett W, Conway SJ, Booth IR (2010) Mechanism of ligand-gated potassium efflux in bacterial pathogens. Proc Natl Acad Sci U S A 107(46):19784-9 doi:10.1073/pnas.1012716107
Sargentini NJ, Gularte NP, Hudman DA (2016) Screen for genes involved in radiation survival of Escherichia coli and construction of a reference database. Mutat Res 793-794:1-14 doi:10.1016/j.mrfmmm.2016.10.001
Sham LT, Butler EK, Lebar MD, Kahne D, Bernhardt TG, Ruiz N (2014) Bacterial cell wall. MurJ is the flippase of lipid-linked precursors for peptidoglycan biogenesis. Science 345(6193):220-2 doi:10.1126/science.1254522
Shaw KJ, Miller N, Liu X, Lerner D, Wan J, Bittner A, Morrow BJ (2003) Comparison of the changes in global gene expression of Escherichia coli induced by four bactericidal agents. J Mol Microbiol Biotechnol 5(2):105-22 doi:10.1159/000069981
Sheikh J, Hicks S, Dall'Agnol M, Phillips AD, Nataro JP (2001) Roles for Fis and YafK in biofilm formation by enteroaggregative Escherichia coli. Mol Microbiol 41(5):983-97 doi:10.1046/j.1365-2958.2001.02512.x
Shih GC, Kahler CM, Carlson RW, Rahman MM, Stephens DS (2001) gmhX, a novel gene required for the incorporation of L-glycero-D-manno-heptose into lipooligosaccharide in Neisseria meningitidis. Microbiology (Reading) 147(Pt 8):2367-2377 doi:10.1099/00221287-147-8-2367
Smith MW, Tyreman DR, Payne GM, Marshall NJ, Payne JW (1999) Substrate specificity of the periplasmic dipeptide-binding protein from Escherichia coli: experimental basis for the design of peptide prodrugs. Microbiology (Reading) 145 ( Pt 10):2891-901 doi:10.1099/00221287-145-10-2891
Sugiyama Y, Nakamura A, Matsumoto M, Kanbe A, Sakanaka M, Higashi K, Igarashi K, Katayama T, Suzuki H, Kurihara S (2016) A Novel Putrescine Exporter SapBCDF of Escherichia coli. J Biol Chem 291(51):26343-26351 doi:10.1074/jbc.M116.762450
Sui L, Warren JC, Russell JP, Stourman NV (2012) Comparison of the functions of glutathionylspermidine synthetase/amidase from E. coli and its predicted homologues YgiC and YjfC. Int J Biochem Mol Biol 3(3):302-12
Szczepaniak J, Press C, Kleanthous C (2020) The multifarious roles of Tol-Pal in Gram-negative bacteria. FEMS Microbiol Rev 44(4):490-506 doi:10.1093/femsre/fuaa018
Thoden JB, Firestine S, Nixon A, Benkovic SJ, Holden HM (2000) Molecular structure of Escherichia coli PurT-encoded glycinamide ribonucleotide transformylase. Biochemistry 39(30):8791-802 doi:10.1021/bi000926j
Turnbull AL, Surette MG (2008) L-Cysteine is required for induced antibiotic resistance in actively swarming Salmonella enterica serovar Typhimurium. Microbiology (Reading) 154(Pt 11):3410-3419 doi:10.1099/mic.0.2008/020347-0
Verhoeven EE, van Kesteren M, Moolenaar GF, Visse R, Goosen N (2000) Catalytic sites for 3' and 5' incision of Escherichia coli nucleotide excision repair are both located in UvrC. J Biol Chem 275(7):5120-3 doi:10.1074/jbc.275.7.5120
Werner J, Misra R (2005) YaeT (Omp85) affects the assembly of lipid-dependent and lipid-independent outer membrane proteins of Escherichia coli. Mol Microbiol 57(5):1450-9 doi:10.1111/j.1365-2958.2005.04775.x
Yethon JA, Vinogradov E, Perry MB, Whitfield C (2000) Mutation of the lipopolysaccharide core glycosyltransferase encoded by waaG destabilizes the outer membrane of Escherichia coli by interfering with core phosphorylation. J Bacteriol 182(19):5620-3 doi:10.1128/jb.182.19.5620-5623.2000
